# Supplementary material
Source: PubMed Central journal article supplement (PMC8376083)

# Supplementary Figure 1

**A**

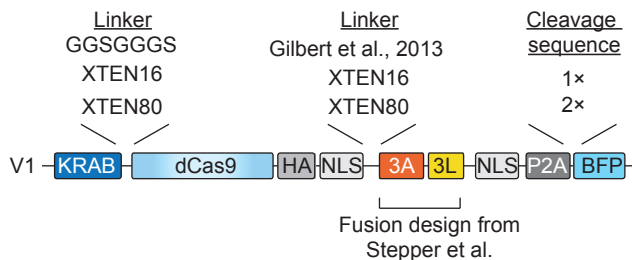

**B**

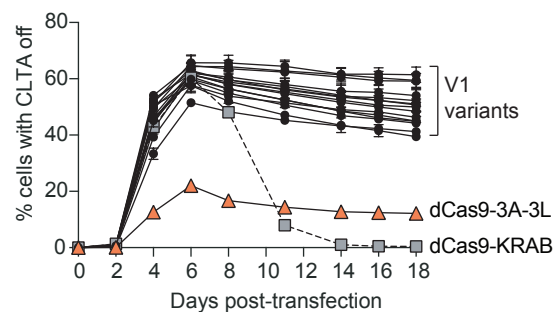

**C**

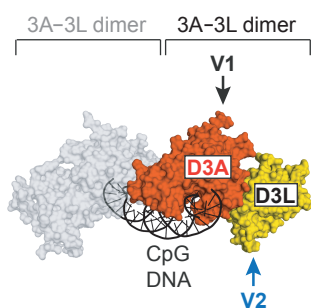

**D**

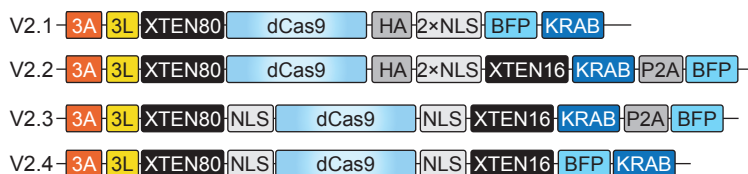

**E**

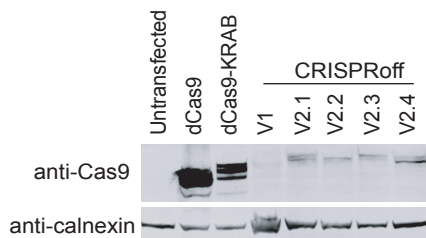

**F**

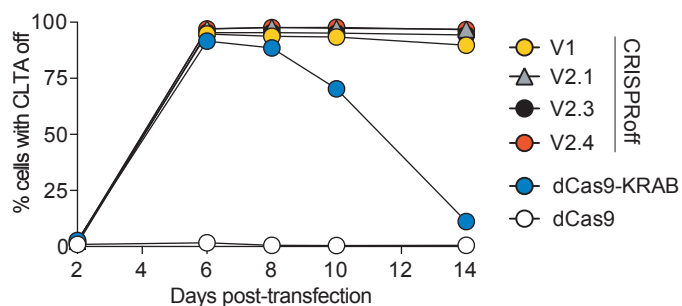

**G**

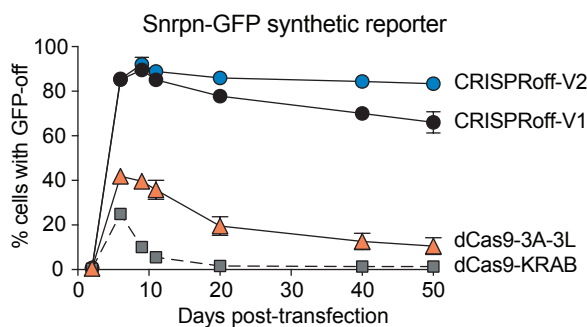

**H**

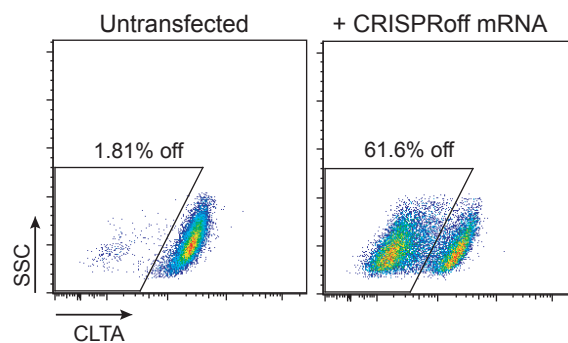

**I**

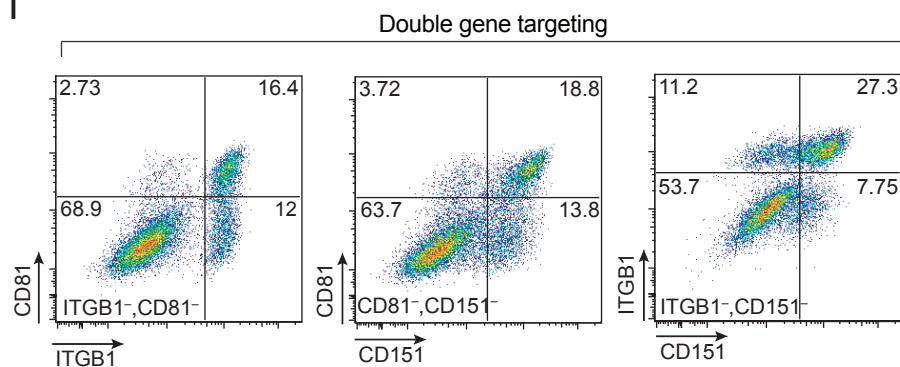

**J**

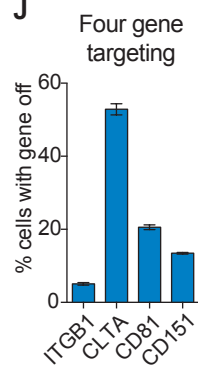

**K**

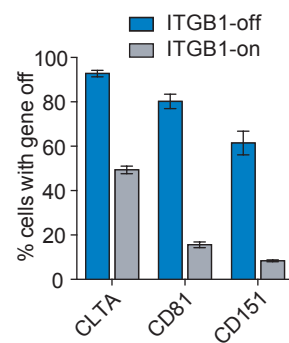

Supplement: NIHMS1685643-supplement-1.pdf [file NIHMS1685643-supplement-1.pdf]

## Supplementary Figure 2

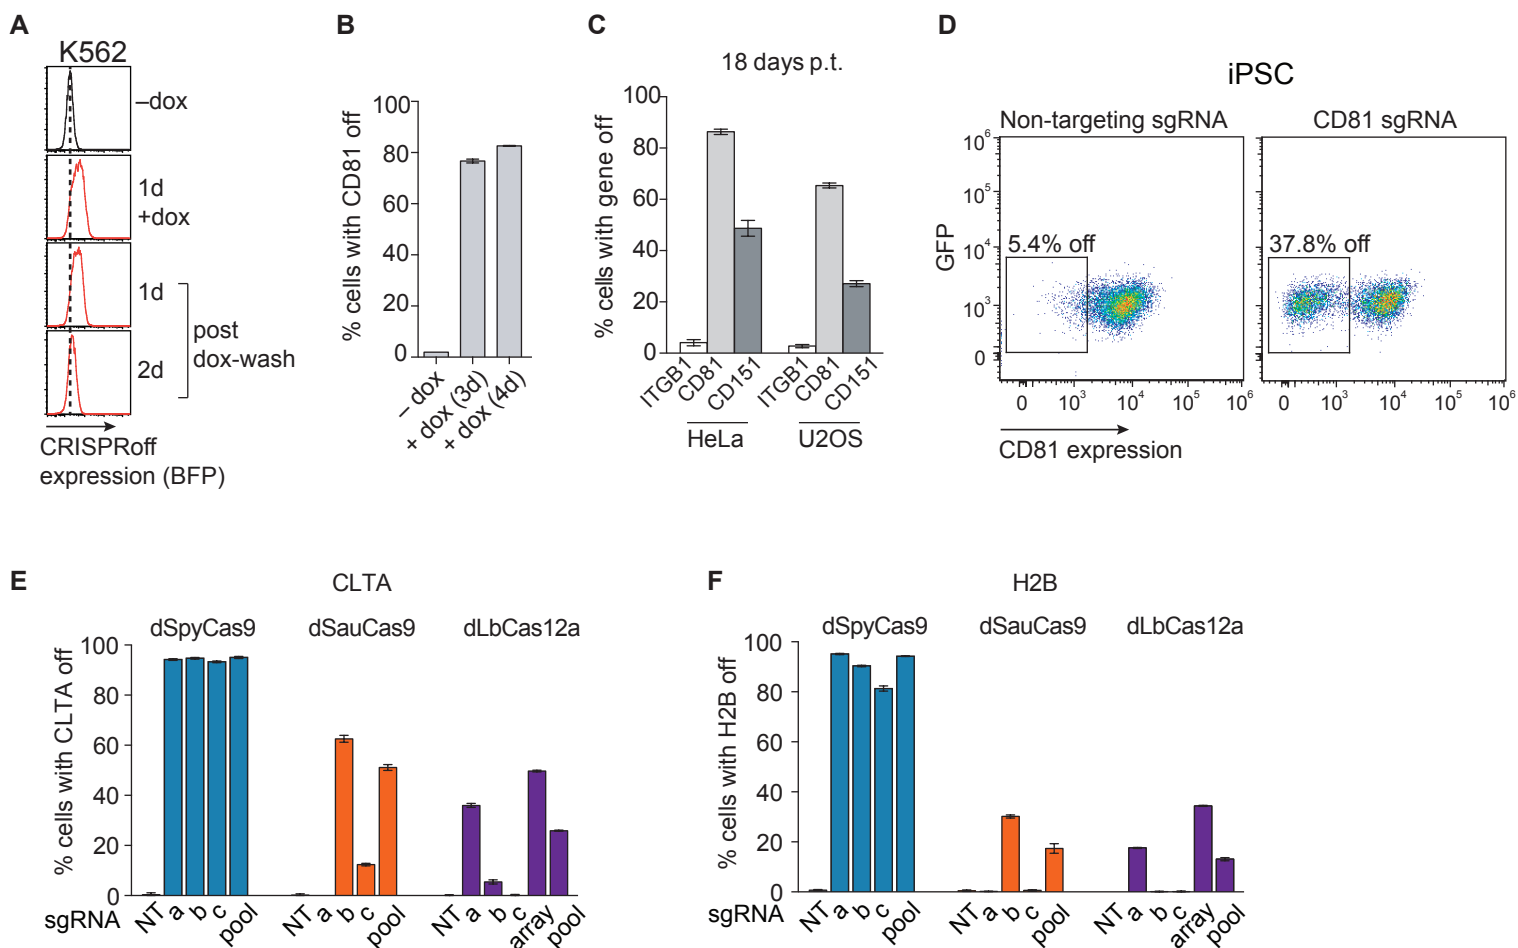

Supplement: NIHMS1685643-supplement-2.pdf [file NIHMS1685643-supplement-2.pdf]

**Supplementary Figure 3**

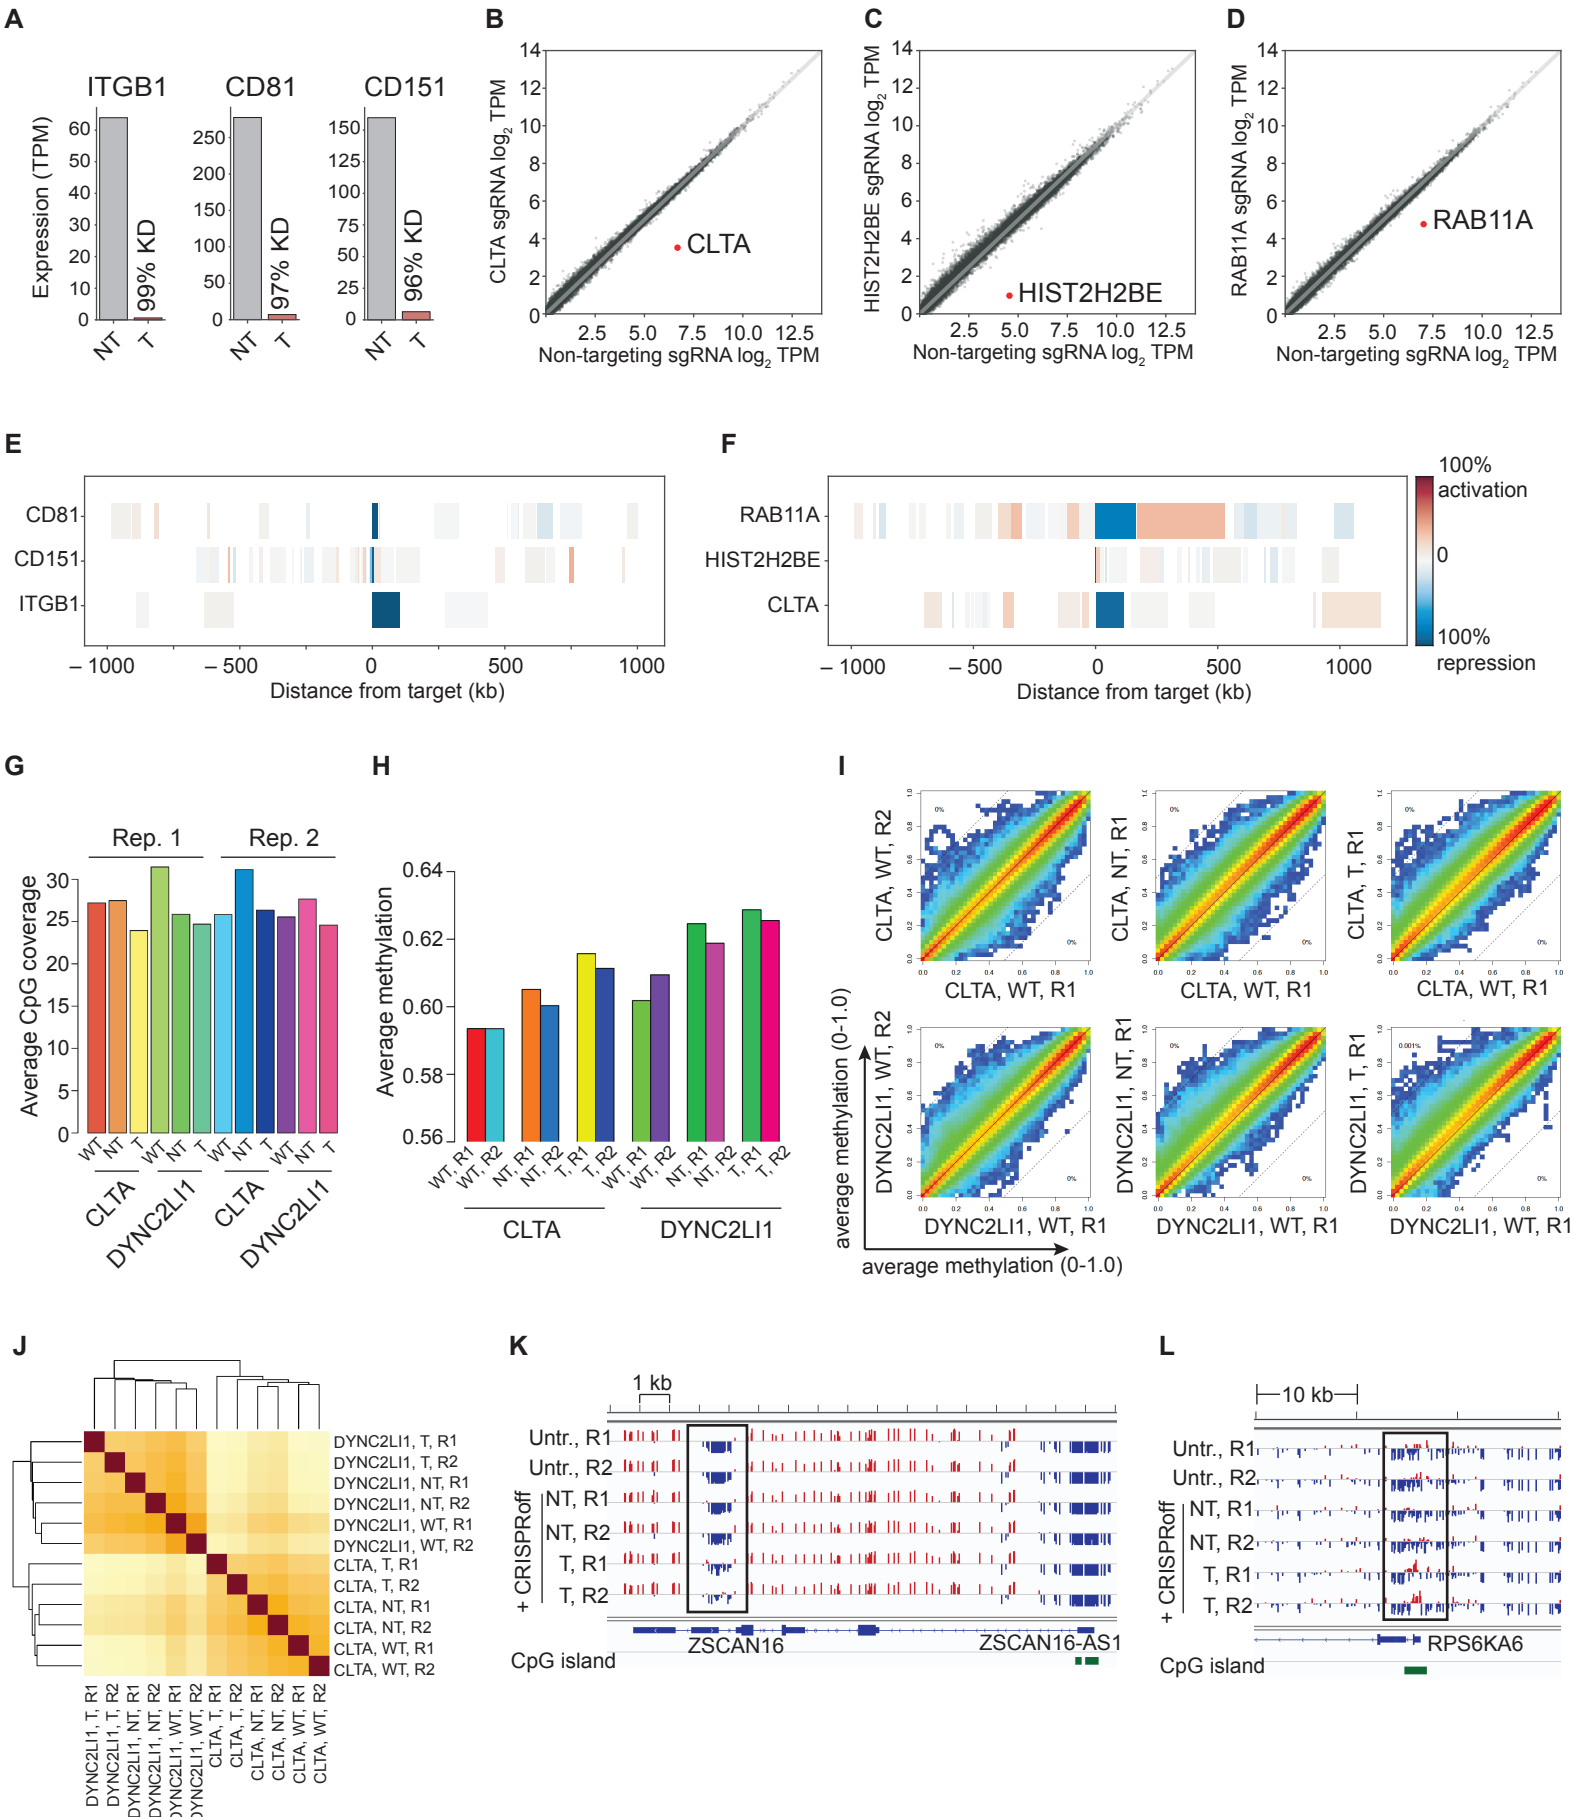

Supplement: NIHMS1685643-supplement-3.pdf [file NIHMS1685643-supplement-3.pdf]

# Supplementary Figure 5

**A**

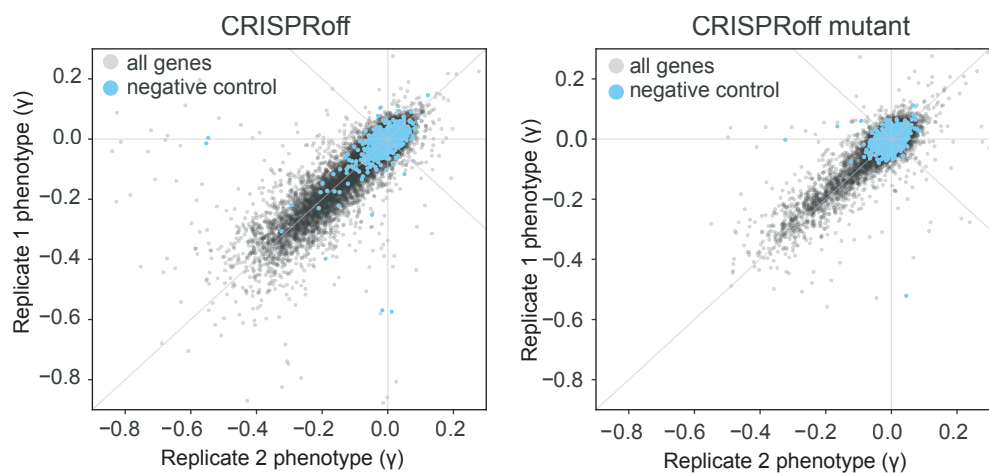

**B**

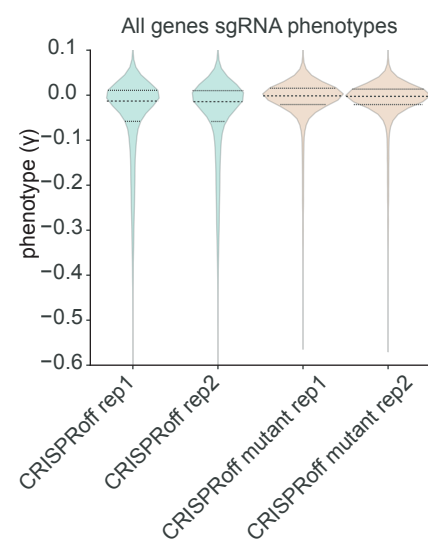

**C**

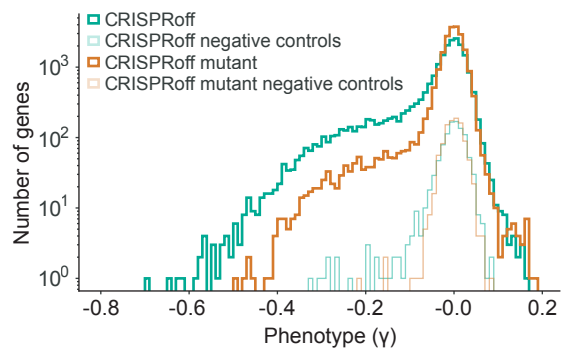

**D**

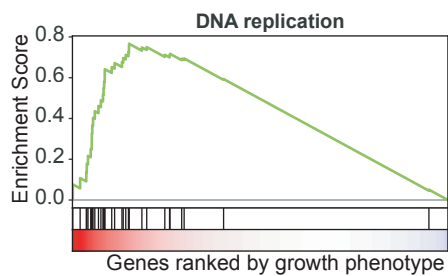

**E**

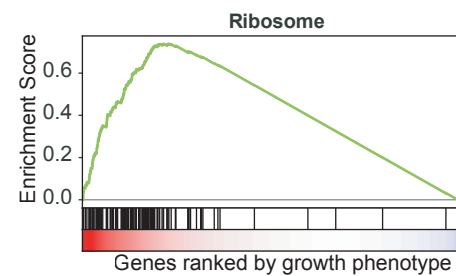

Supplement: NIHMS1685643-supplement-5.pdf [file NIHMS1685643-supplement-5.pdf]

# Supplementary Figure 6

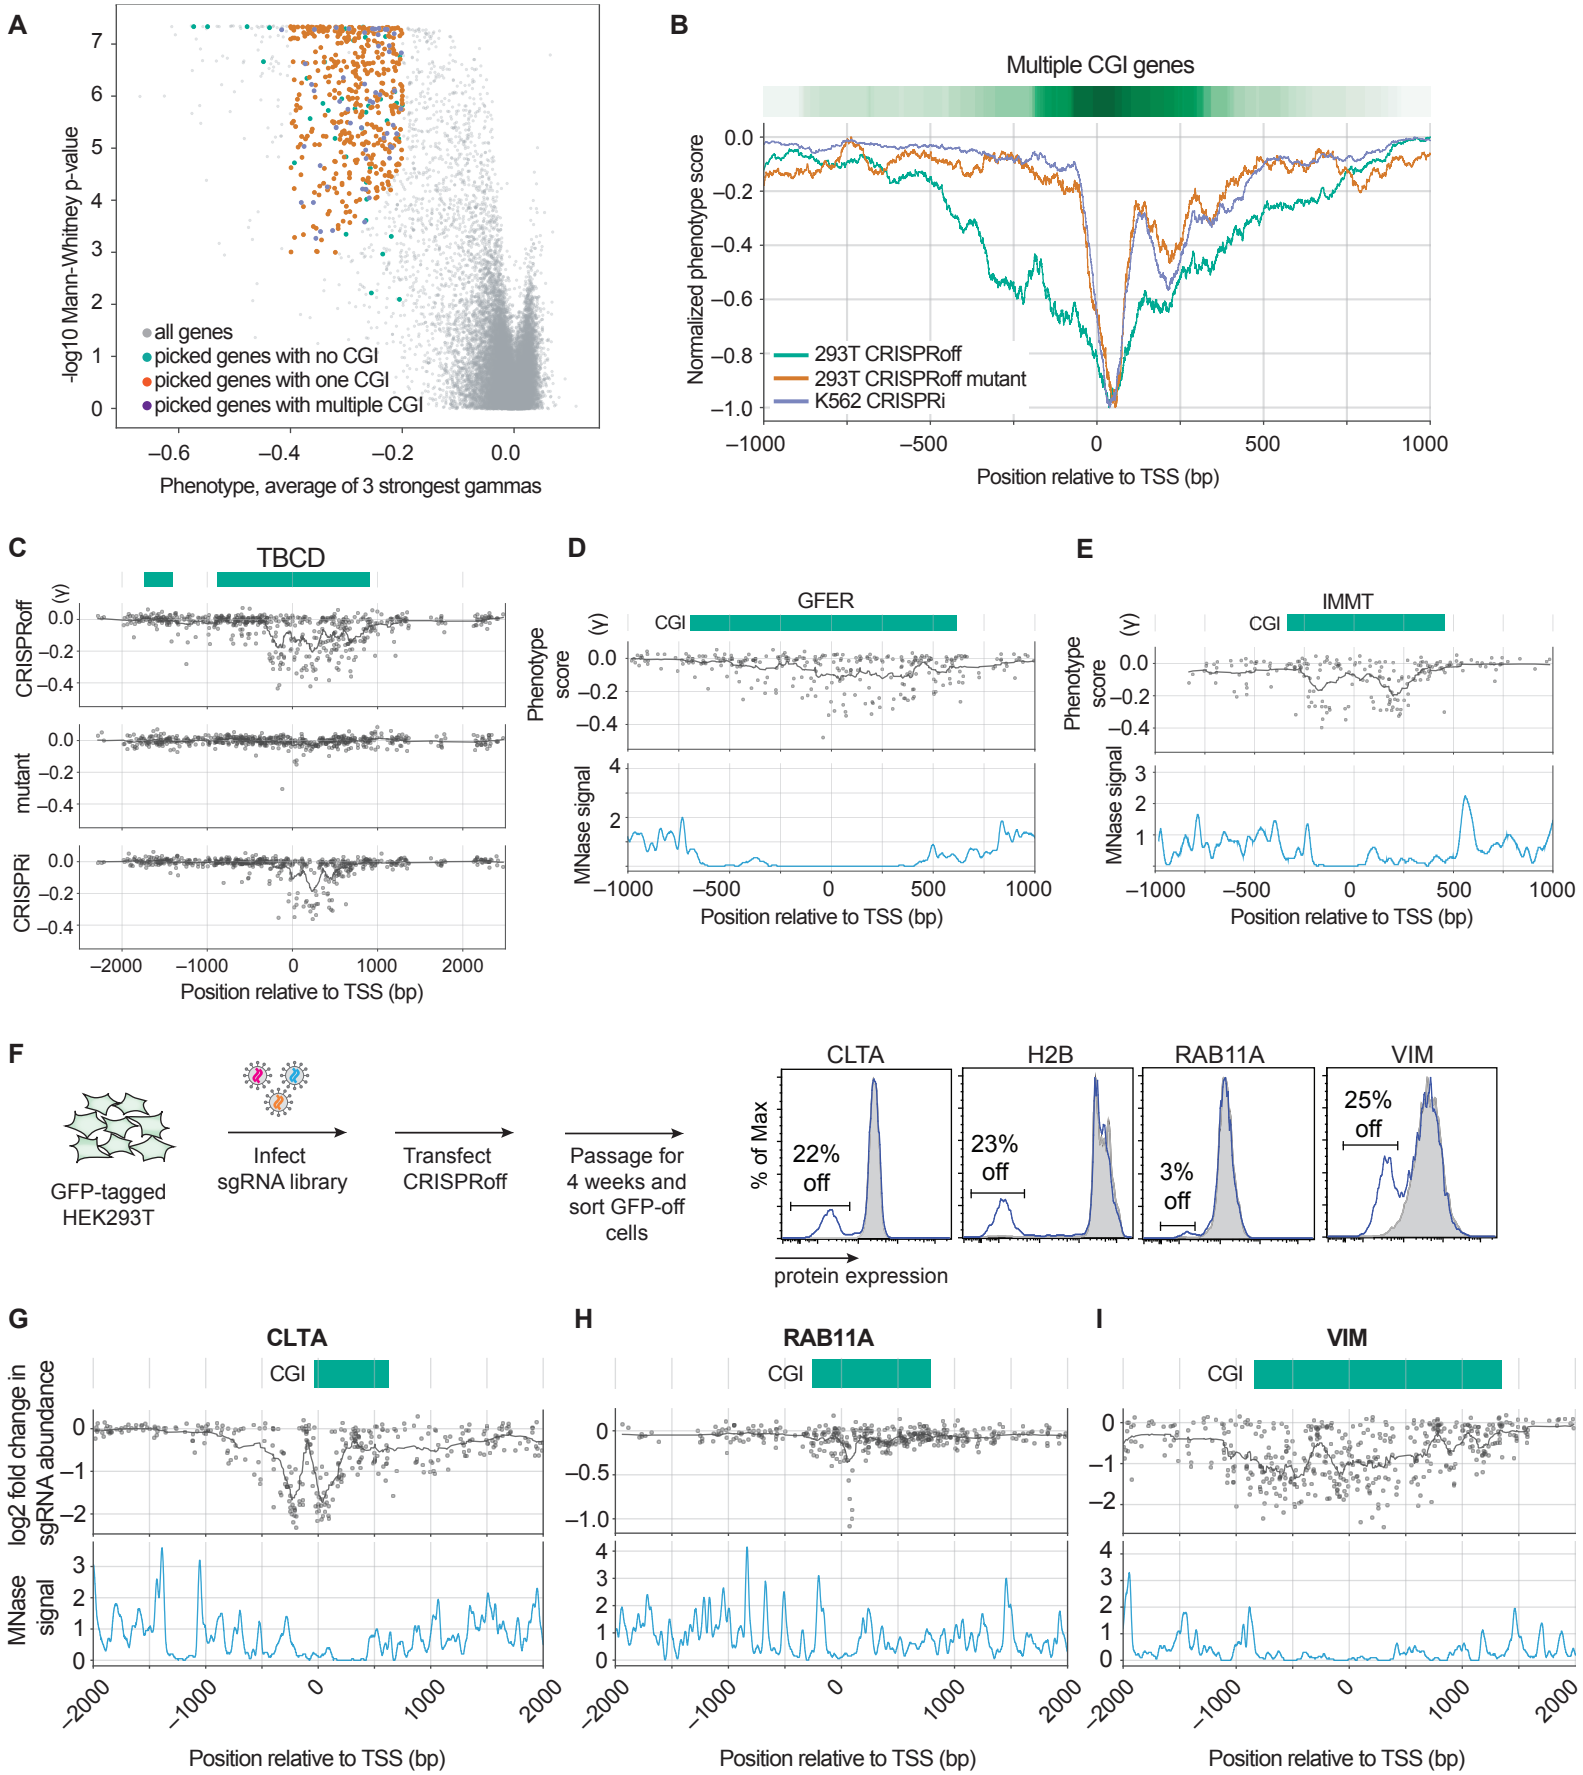

Supplement: NIHMS1685643-supplement-6.pdf [file NIHMS1685643-supplement-6.pdf]

# Supplementary Figure 7

**A**

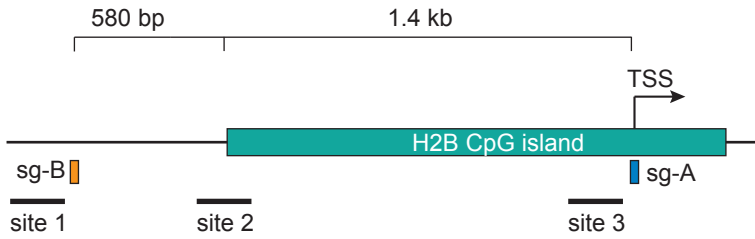

**B**

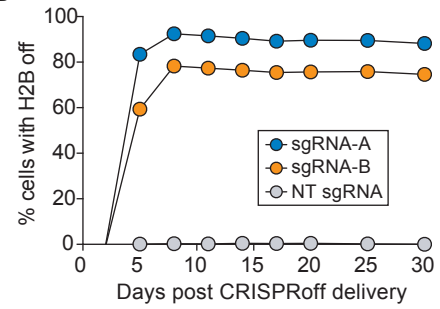

**C**

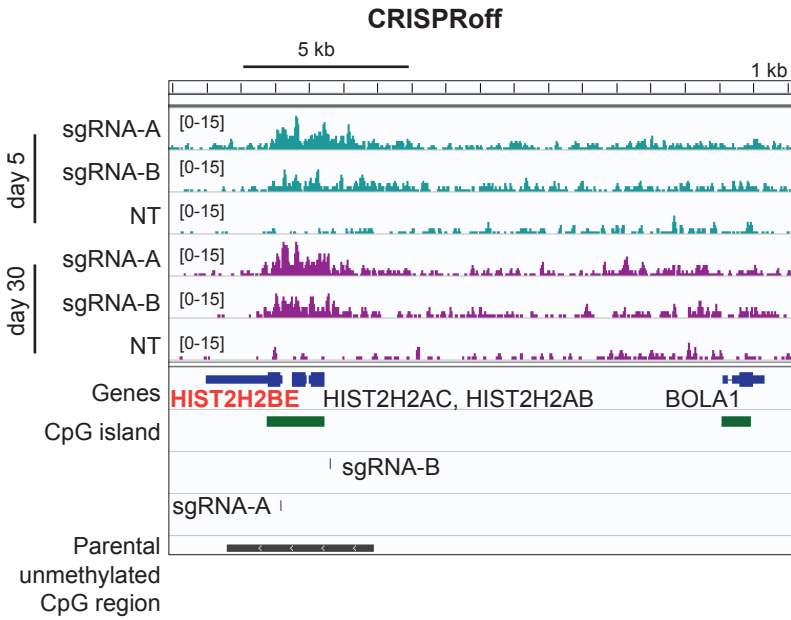

**D**

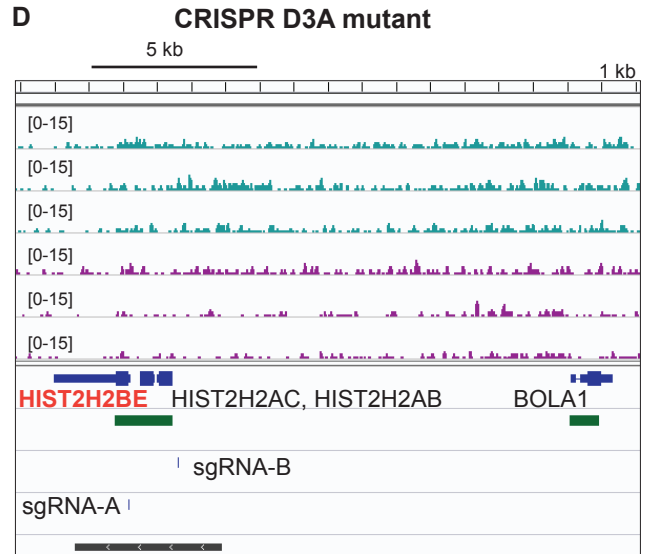

**E**

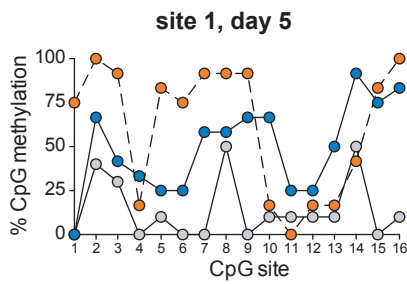

**F**

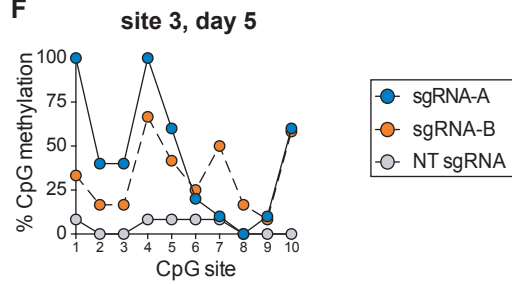

**G**

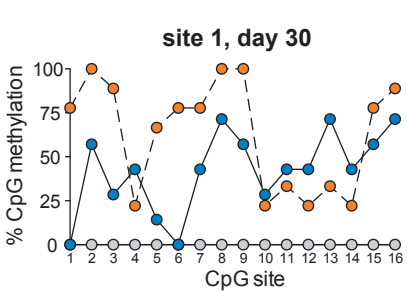

**H**

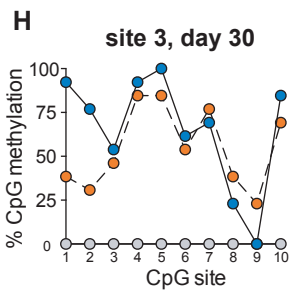

**I**

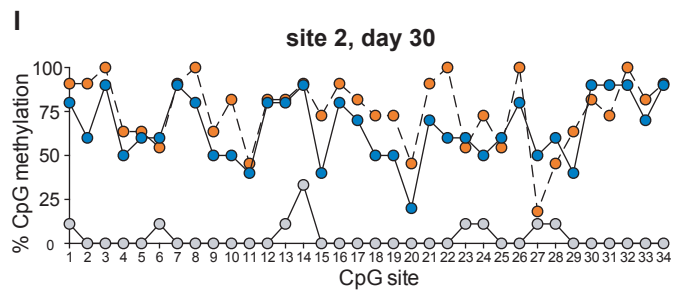

Supplement: NIHMS1685643-supplement-7.pdf [file NIHMS1685643-supplement-7.pdf]
